# Supplementary material
Source: PubMed Central journal article supplement (PMC7964705)
Supplement: 4330_figures.pdf [file 4330_figures.pdf]

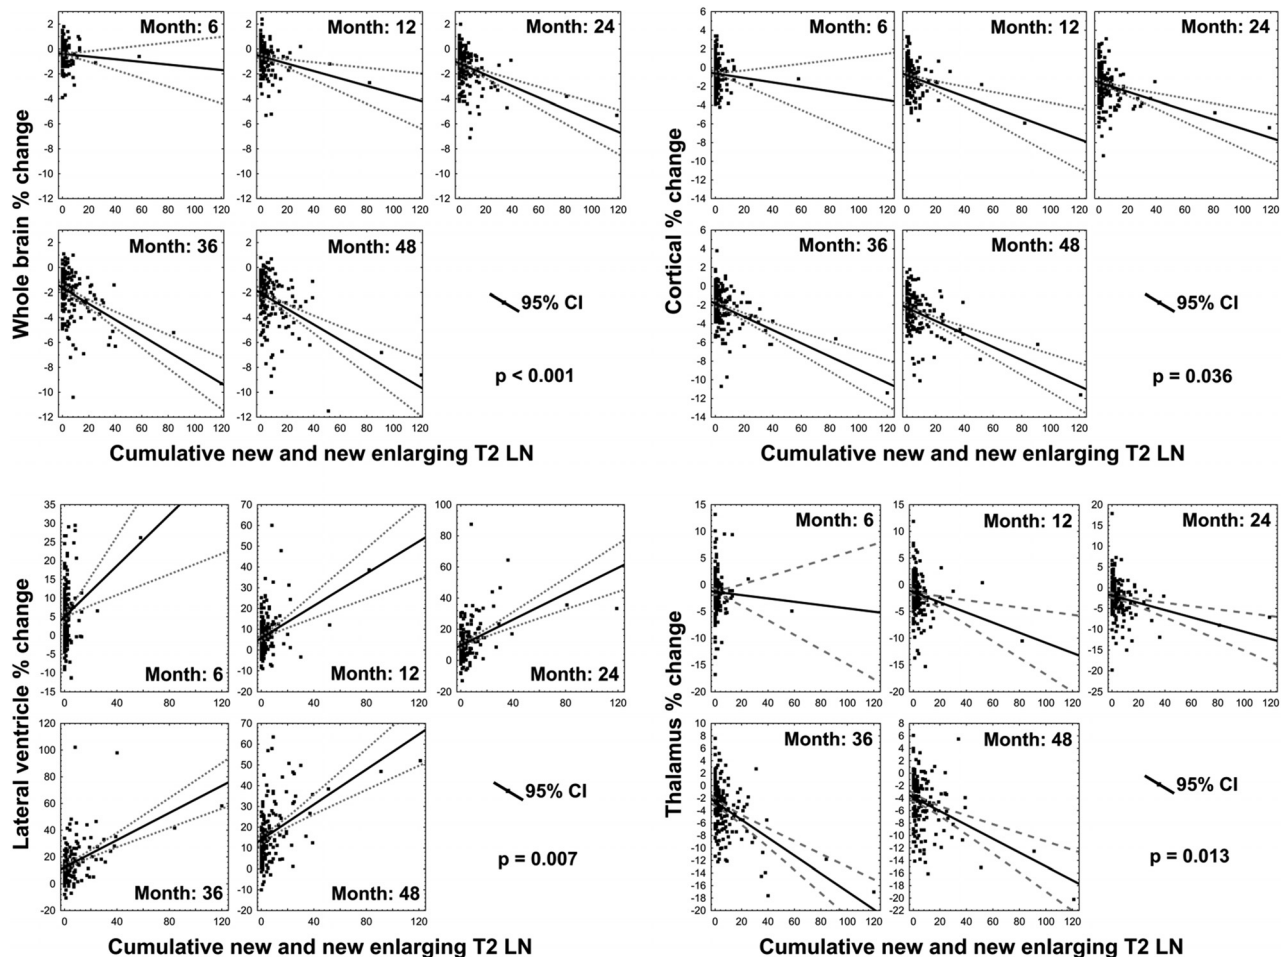

**ON-LINE FIG 1.** Mixed-effect model analysis of global and tissue-specific brain-volume percent changes over 48 months (dependent variables) with respect to the evolution of longitudinal predictive cumulative total new/enlarging T2 lesion activity (independent variables). The Benjamini-Hochberg method was used to minimize the false-discovery rate, and  $P$  values of  $<.05$  are considered significant.<sup>23</sup>

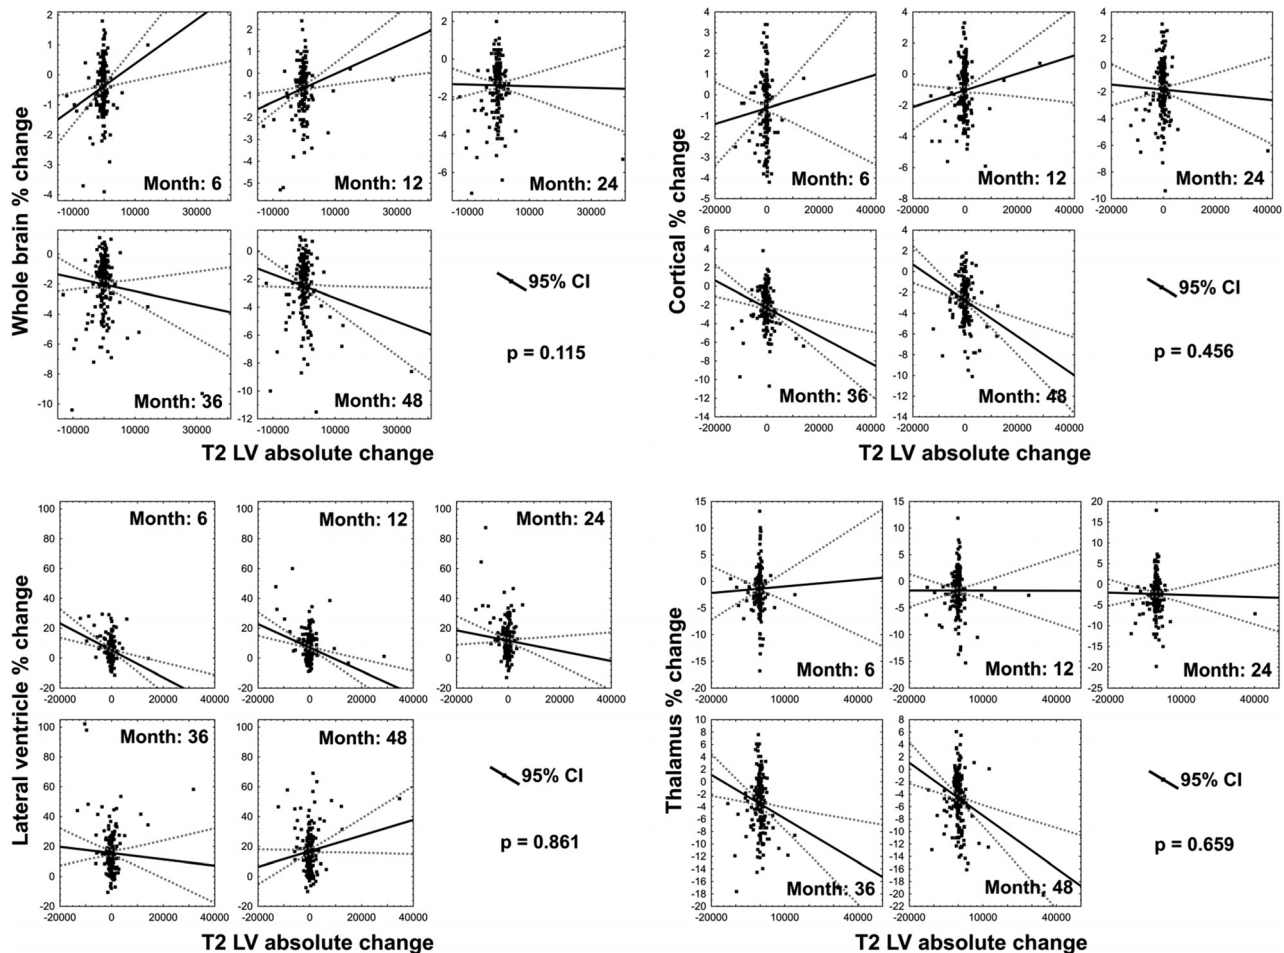

**ON-LINE FIG 2.** Mixed-effect model analysis of global and tissue-specific brain-volume percent changes over 48 months (dependent variables) with respect to the evolution of longitudinal absolute T2 lesion volume changes (independent variables). The Benjamini–Hochberg method was used to minimize the false-discovery rate, and  $P$  values of  $<.05$  are considered significant.<sup>23</sup>
